# Supplementary material
Source: MDPI journal article supplement (https://www.mdpi.com/2073-4344/12/6/665)
Supplement: s1 [file s1]

## Supplementary Information

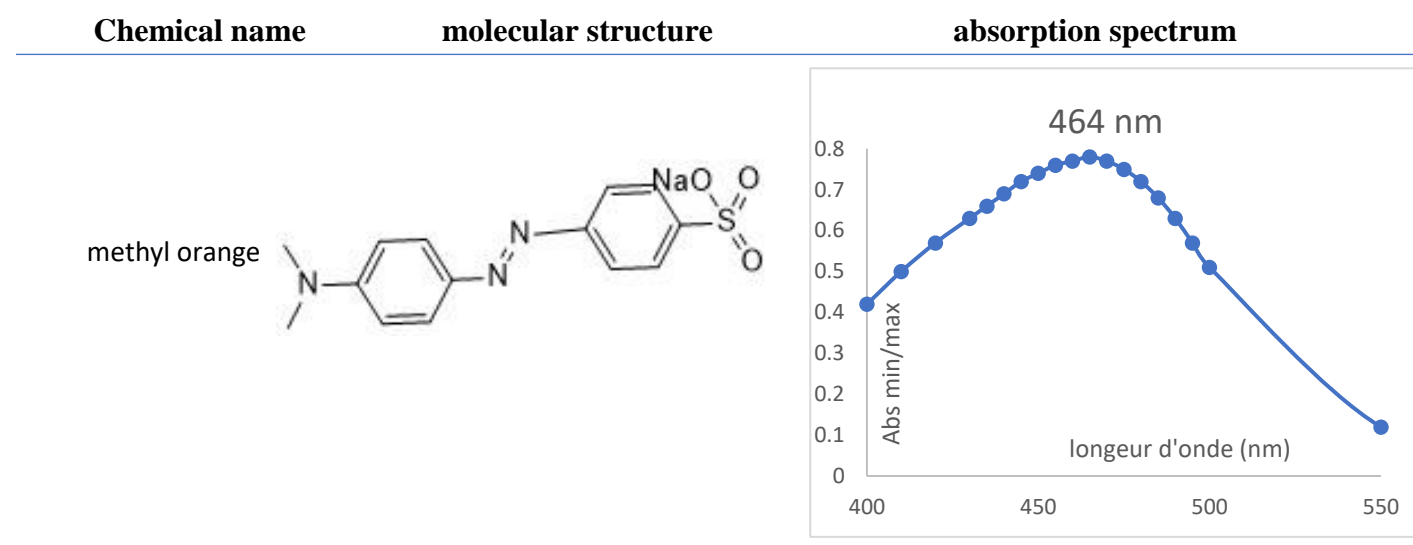

Figure S1. Molecular structure and absorption spectrum of methyl orange MO.

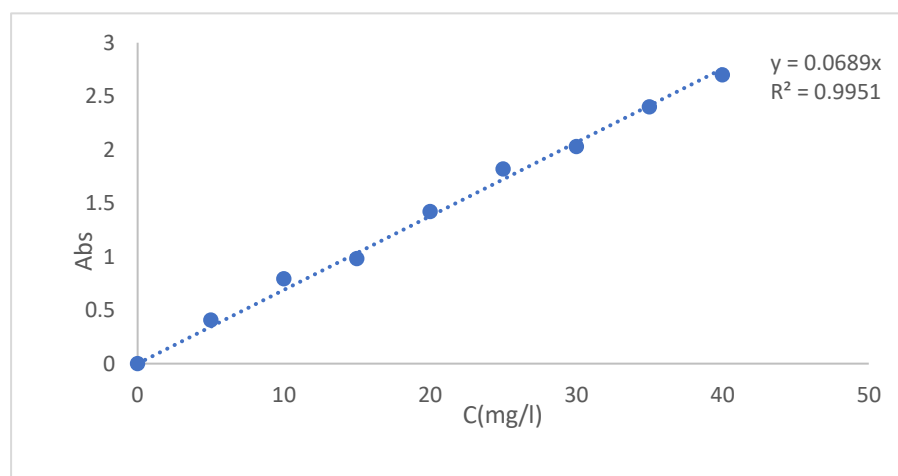

Figure S2: Calibration curve of methyl orange dye at 464nm wavelength

# **Prediction and Optimization of Electro Fenton process parameters using a BBD experimental design**

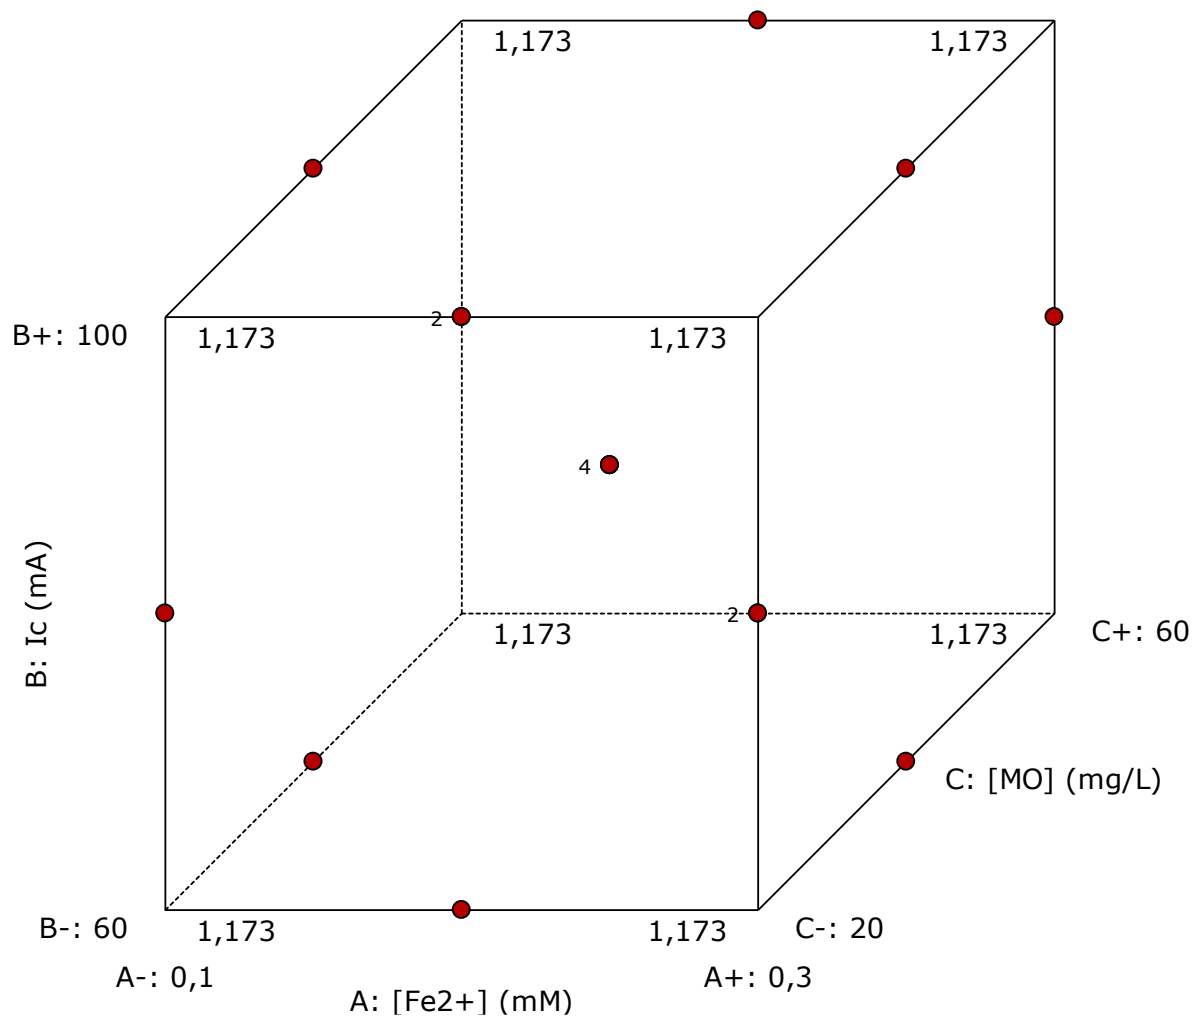

Figure S3: geometrical location of the experimental points of the BBD design.

Table S1: Experimental design matrix and response

|     | Factor 1              | Factor 2         | Factor 3 | Response 1              |           |
|-----|-----------------------|------------------|----------|-------------------------|-----------|
| Run | A:[Fe <sup>2+</sup> ] | B:I <sub>c</sub> | C:[MO]   | Dis coloration rate (%) |           |
|     | mM                    | mA               | mg/L     | Experimental            | Predicted |
| 1   | 0,2                   | 60               | 60       | 93,00                   | 95,06     |
| 2   | 0,2                   | 100              | 20       | 85,27                   | 85,90     |
| 3   | 0,2                   | 80               | 40       | 91,94                   | 90,48     |
| 4   | 0,1                   | 100              | 40       | 85,50                   | 87,88     |
| 5   | 0,3                   | 80               | 60       | 94,20                   | 96,32     |
| 6   | 0,1                   | 60               | 40       | 88,72                   | 89,23     |
| 7   | 0,2                   | 60               | 20       | 87,11                   | 87,25     |
| 8   | 0,3                   | 60               | 40       | 94,22                   | 93,08     |
| 9   | 0,1                   | 80               | 60       | 94,19                   | 92,46     |
| 10  | 0,2                   | 80               | 40       | 91,98                   | 90,48     |
| 11  | 0,2                   | 80               | 40       | 91,94                   | 90,48     |
| 12  | 0,3                   | 100              | 40       | 93,83                   | 91,74     |
| 13  | 0,2                   | 100              | 60       | 93,07                   | 93,72     |
| 14  | 0,2                   | 80               | 40       | 91,94                   | 90,48     |
| 15  | 0,1                   | 80               | 20       | 84,62                   | 84,65     |
| 16  | 0,3                   | 80               | 20       | 86,20                   | 88,50     |

Table S2: Optimization constraints using the desirability function:

| Name                      | Goal                    | Importance | Graphe                                                                                                                                |
|---------------------------|-------------------------|------------|---------------------------------------------------------------------------------------------------------------------------------------|
| $[\text{Fe}^{2+}]$        | is in range [0,1 - 0,3] | 3          | 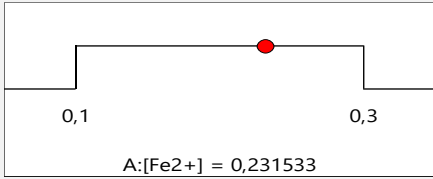 <p>A: <math>[\text{Fe}^{2+}] = 0,231533</math></p> |
| $I_c$                     | equal to 80 mA          | 3          |  <p>B: <math>I_c = 80</math></p>                    |
| [MO]                      | equal to 60 mg/L        | 3          |  <p>C: <math>[\text{MO}] = 60</math></p>            |
| <b>Discoloration rate</b> | Target = 95%            | 5          |  <p>Discoloration = 95,00</p>                      |
